# Supplementary material
Source: publisher figshare collection journal article supplement (https://karger.figshare.com/articles/dataset/_/20015120)
Supplement: Supplementary file 1 [file 1]

|  | Total (n=15) | Low turnover (n=6) | High turnover (n=6) | p-value |
| --- | --- | --- | --- | --- |
| PTH, pmol/l | 26 ±15 | 21 ±12 | 34 ±18 | 0.19 |
| Ionized calcium (pH=7.4), mmol/l | 1.20 ±0.07 | 1.16 ±0.07 | 1.24 ±0.05 | 0.04* |
| Phosphate, mmol/l | 1.48 ±0.34 | 1.42 ±0.37 | 1.50 ±0.40 | 0.73 |
| Vitamin D, nmol/l | 70 ±31 | 76 ±30 | 68 ±29 | 0.65 |
| bALP, µg/l | 23 ±7 | 20 ±8 | 24 ±5 | 0.37 |
| OC, µg/l | 180 ±90 | 134 ±43 | 250 ±97 | 0.02* |
| FGF-23, pg/ml | 3105 (970; 7220) | 1340 (802;3653) | 3750 (871;9355) | 0.345 |
| OPG, pmol/l | 8.8 ±3.1 | 8.7 ±4.2 | 8.9 ±2.1 | 0.94 |
| Ki, ml min-1 ml-1 (lumbar) | 0.032 ±0.007 | 0.027 ±0.003 | 0.038 ±0.008 | 0.01* |

| ***S Table 1*** *Biomarkers and PET results (Ki) are shown first as a total from all the patients who underwent bone biopsy. Subsequently, the results are divided based on whether the bone biopsy showed that the patients had low or high bone turnover. Normally distributed data are presented as mean ± SD and non-normally distributed data as median (25th percentile; 75th percentile). Intact parathyroid hormone (PTH), bone-specific alkaline phosphatase (bALP), osteocalcin (OC), fibroblast growth factor 23 (FGF-23), osteoprotegerin (OPG).* |
| --- |
